# Supplementary material for: Potentiometric Surfactant Sensor Based on 1,3-Dihexadecyl-1H-benzo[d]imidazol-3-ium for Anionic Surfactants in Detergents and Household Care Products
Source: Molecules. 2021 Jun 14;26(12):3627. doi: 10.3390/molecules26123627 (PMC8231998; doi:10.3390/molecules26123627)
Supplement: Supplementary file 1 [file molecules-26-03627-s001.zip › molecules-1240136-supplementary.pdf]

## Article

# Potentiometric Surfactant Sensor Based on 1,3-Dihexadecyl-1*H*-benzo[*d*]imidazol-3-ium for Anionic Surfactants in Detergents and Household Care Products

Nikola Sakač <sup>1,\*</sup>, Dubravka Madunić-Čačić <sup>1,2</sup>, Dean Marković <sup>3</sup>, Lucija Hok <sup>4</sup>, Robert Vianello <sup>4</sup>, Bojan Šarkanj <sup>5</sup>, Bojan Đurin <sup>6</sup>, Krunoslav Hajdek <sup>7</sup>, Božo Smoljan <sup>7</sup>, Stjepan Milardović <sup>8</sup>, Brunislav Matasović <sup>9</sup>, and Marija Joza-nović <sup>9,\*</sup>

<sup>1</sup> University of Zagreb, Faculty of Geotechnical Engineering, 42000 Varaždin, Croatia; nikola.sakac@gfv.unizg.hr

<sup>2</sup> Saponia Chemical, Pharmaceutical and Foodstuff Industry, Inc., 31000 Osijek, Croatia; dubravka.madunic-cacic@saponia.hr

<sup>3</sup> University of Rijeka, Department of Biotechnology, 51000 Rijeka, Croatia; dean.markovic@biotech.uniri.hr

<sup>4</sup> Ruđer Bošković Institute, Division of Organic Chemistry and Biochemistry, 10000 Zagreb, Croatia; lucija.hok@irb.hr (L.H.); robert.vianello@irb.hr (R.V.)

<sup>5</sup> University North, Department of Food Technology, 48000 Koprivnica, Croatia; bsarkanj@unin.hr

<sup>6</sup> University North, Department of Civil Engineering, 42000 Varaždin, Croatia; bdjurin@unin.hr

<sup>7</sup> University North, Department of Packaging, Recycling and Environmental protection, 48000 Koprivnica, Croatia; krunoslav.hajdek@unin.hr (K.H.); bozo.smoljan@unin.hr (B.S.)

<sup>8</sup> University of Zagreb, Faculty of Chemical Engineering and Technology, 10000, Zagreb, Croatia; stjepan.milardovic@fkit.hr

<sup>9</sup> University of Osijek, Department of Chemistry, HR-31000 Osijek, Croatia; brunislav.matasovic@kemija.unios.hr (B.M.); mjozanovic@kemija.unios.hr (M.J.)

\* Correspondence: nikola.sakac@gfv.unizg.hr; Tel.: +385915830336 (N.S.); mjozanovic@kemija.unios.hr; Tel.: +385996865716 (M.J.)

## Supplementary material

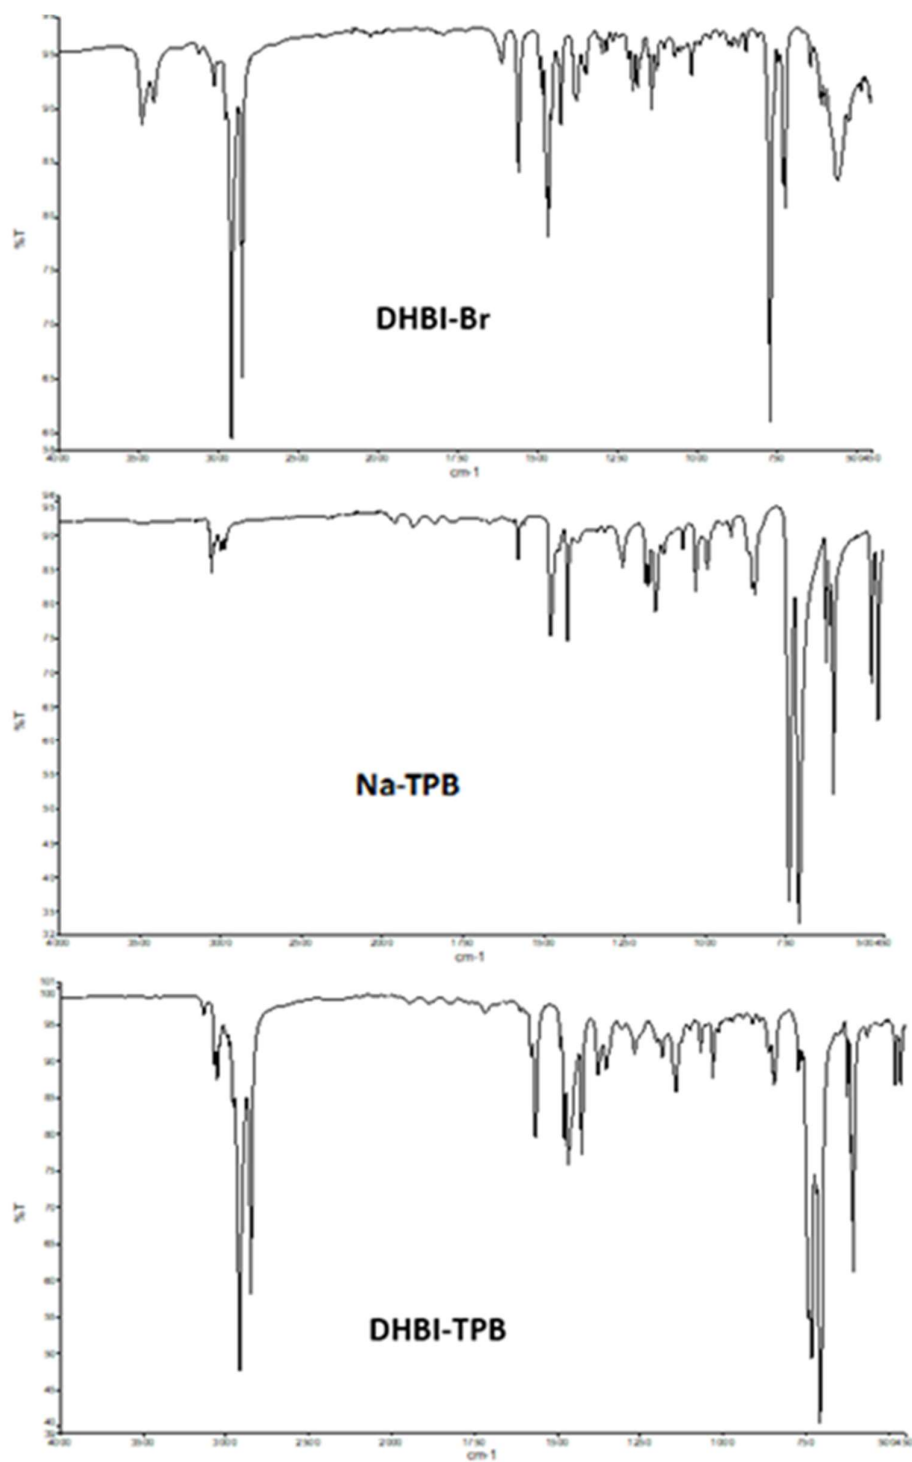

**Figure S1.** ATR-FT-IR spectra of cationic surfactant 1,3-dihexadecyl-1H-benzo[d]imidazol-3-ium bromide (DHBI-Br), sodium terphenyl borate (Na-TPB) and ionophore 1,3-dihexadecyl-1H-benzo[d]imidazol-3-ium tetraphenylborate (DHBI-TPB).

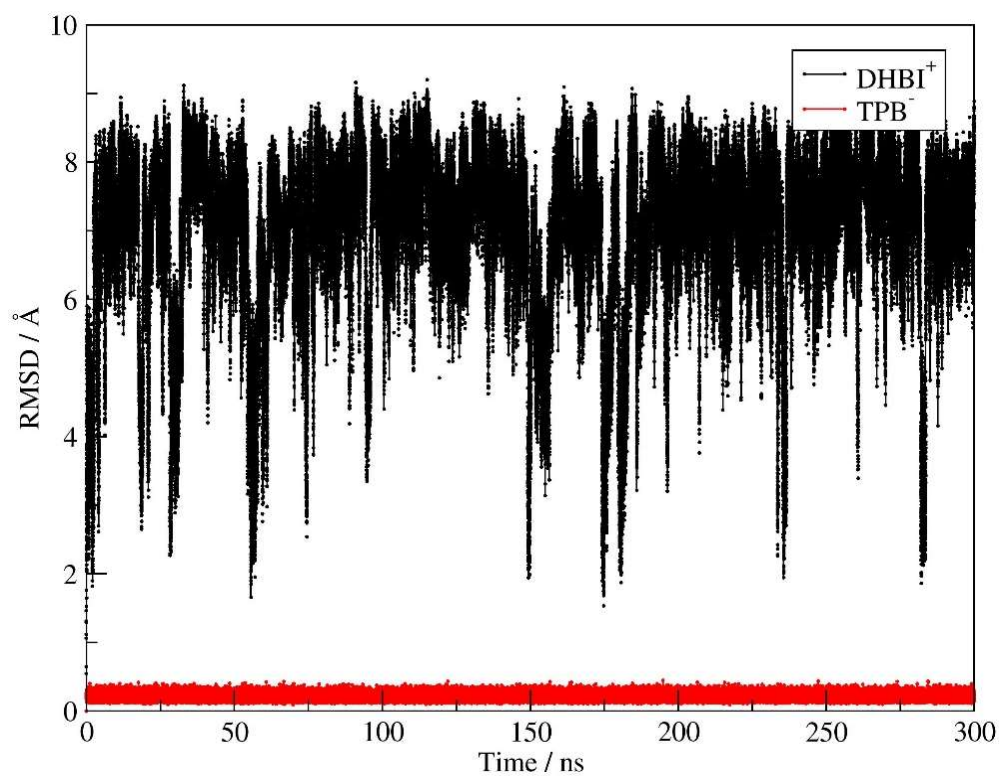

**Figure S2.** RMSD graphs during the molecular dynamics simulation of the DHBI<sup>+</sup> cation (in black) and TPB<sup>-</sup> anion (in red) in the aqueous solution, revealing a much higher flexibility of the former.

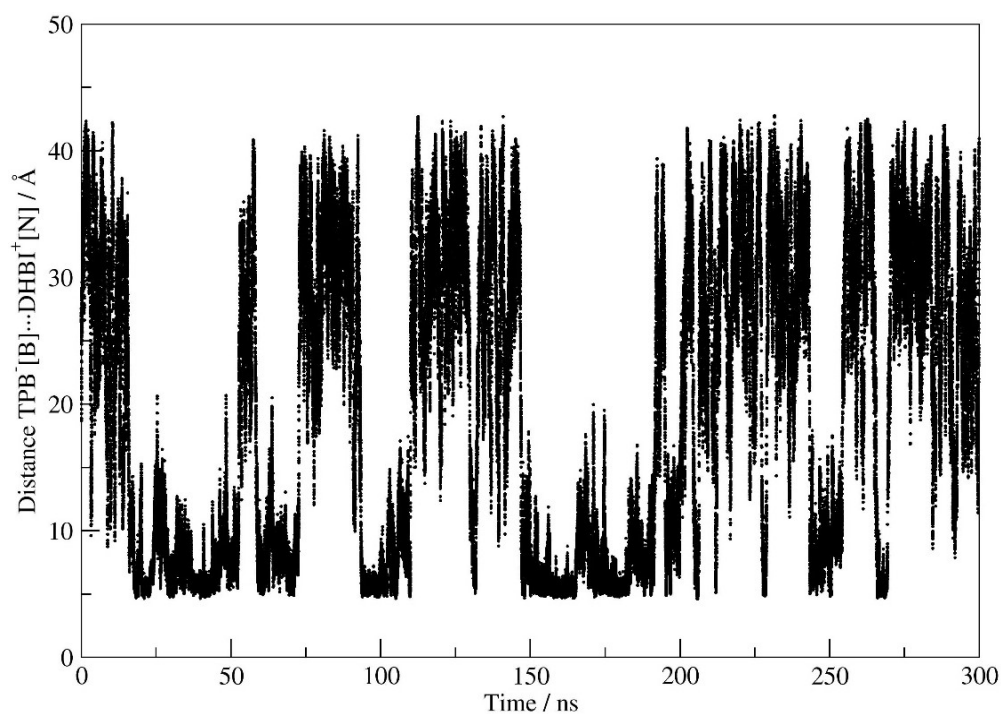

**Figure S3.** Time dependence of the distance between the boron atom in TPB<sup>-</sup> and the nitrogen atoms in DHBI<sup>+</sup> during the molecular dynamics simulation, indicating complex formation in the equilibrium with dissociated components.

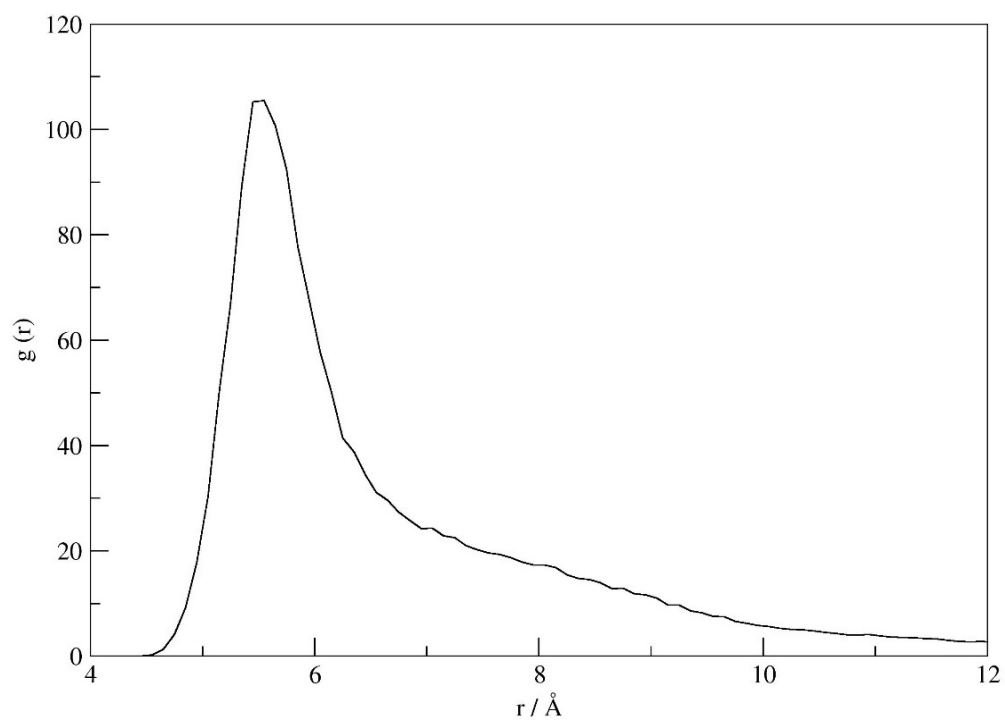

**Figure S4.** RDF graph considering B(TPB)···N(DHBI<sup>+</sup>) distances during 300 ns of the molecular dynamics simulation with the maximum value located at around 5.4 Å.

## ISOLATED COMPONENTS BEFORE THE COMPLEX FORMATION

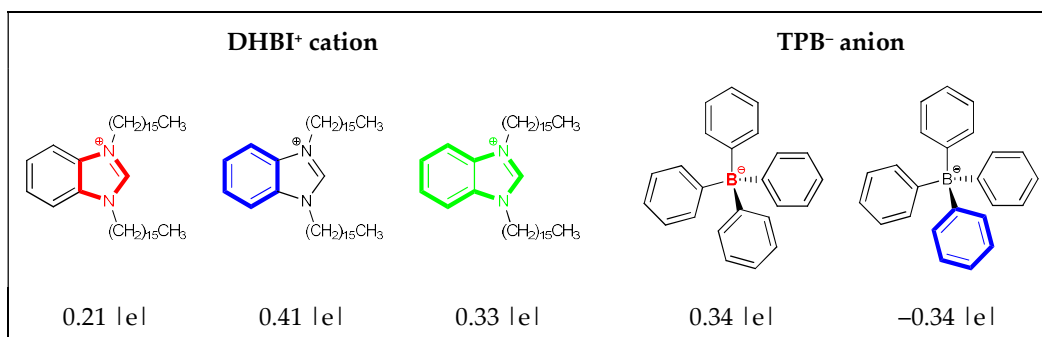

## COMPONENTS WITHIN THE DHBI-TPB COMPLEX

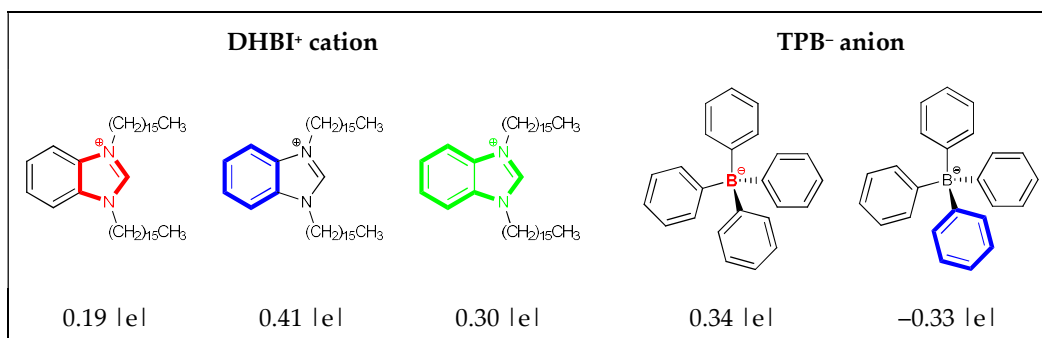

## ENTIRE COMPONENTS WITHIN THE DHBI-TPB COMPLEX

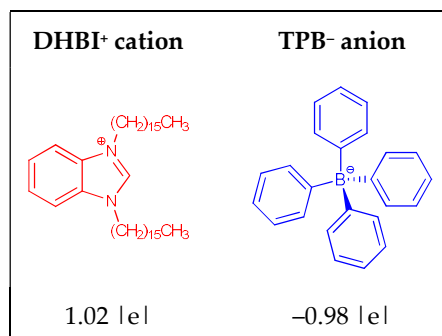

**Figure S5.** Charge distribution within the DHBI<sup>+</sup> cation and the TPB<sup>−</sup> anion, either isolated or within the DHBI-TPB complex, as obtained through the NBO procedure at the (SMD)/M06-2X/6-31+G(d) level of theory. Particular set of atoms considered for the analysis is denoted with a color and includes the attached hydrogen atoms as well.
